# Supplementary material
Source: PubMed Central journal article supplement (PMC9116480)
Supplement: aac.01725-21-s0001.pdf [file aac.01725-21-s0001.pdf]

**Table S1:** Caspofungin, Anidulafungin and Micafungin MICs distribution for isolates recovered between 2009 and 2014 in France

| Species                          | n    | antifungal    | N° of isolates with an MIC (mg/L) of: |       |      |      |       |      |     |    |     |    |    |
|----------------------------------|------|---------------|---------------------------------------|-------|------|------|-------|------|-----|----|-----|----|----|
|                                  |      |               | 0.007                                 | 0.015 | 0.03 | 0.06 | 0.125 | 0.25 | 0.5 | 1  | 2   | 4  | ≥4 |
| <i>Candida albicans</i>          | 1198 | caspofungin   |                                       | 33    | 902  | 230  | 9     | 3    | 5   | 3  | 4   | 5  | 4  |
|                                  |      | micafungin    | 4                                     | 144   | 1004 | 22   | 2     | 3    | 8   | 4  | 6   |    | 1  |
|                                  |      | anidulafungin | 1111                                  | 63    | 8    | 1    | 4     | 7    | 3   |    |     |    |    |
| <i>Candida dubliniensis</i>      | 35   | caspofungin   |                                       | 3     | 31   | 1    |       |      |     |    |     |    |    |
|                                  |      | micafungin    |                                       | 4     | 31   |      |       |      |     |    |     |    |    |
|                                  |      | anidulafungin | 5                                     | 17    | 13   |      |       |      |     |    |     |    |    |
| <i>Candida tropicalis</i>        | 238  | caspofungin   |                                       | 13    | 151  | 64   | 6     |      |     | 1  |     | 2  | 1  |
|                                  |      | micafungin    | 1                                     | 25    | 200  | 8    |       |      | 3   |    | 1   |    |    |
|                                  |      | anidulafungin | 1                                     | 40    | 130  | 55   | 7     | 0    | 4   | 0  | 1   |    |    |
| <i>Candida parapsilosis</i>      | 282  | caspofungin   |                                       |       | 1    | 5    | 42    | 95   | 80  | 48 | 11  |    |    |
|                                  |      | micafungin    |                                       |       |      |      | 10    | 109  | 148 | 14 | 1   |    |    |
|                                  |      | anidulafungin |                                       |       |      |      |       | 1    | 7   | 85 | 176 | 13 |    |
| <i>Candida orthopsilosis</i>     | 14   | caspofungin   |                                       |       | 3    | 6    | 3     | 2    |     |    |     |    |    |
|                                  |      | micafungin    |                                       |       |      |      | 5     | 8    | 1   |    |     |    |    |
|                                  |      | anidulafungin |                                       |       |      |      |       |      | 5   | 6  | 3   |    |    |
| <i>Candida metapsilosis</i>      | 14   | caspofungin   |                                       |       | 7    | 4    | 2     | 1    |     |    |     |    |    |
|                                  |      | micafungin    |                                       |       |      | 1    | 6     | 6    | 1   |    |     |    |    |
|                                  |      | anidulafungin |                                       |       |      |      | 1     | 3    | 10  |    |     |    |    |
| <i>Candida glabrata</i>          | 466  | caspofungin   |                                       |       | 56   | 306  | 69    | 8    | 5   | 6  | 1   | 9  | 6  |
|                                  |      | micafungin    | 9                                     | 114   | 318  | 8    | 3     | 3    | 6   | 3  | 2   |    |    |
|                                  |      | anidulafungin | 15                                    | 50    | 260  | 116  | 4     | 3    | 9   | 8  | 1   |    |    |
| <i>Saccharomyces cerevisiae</i>  | 19   | caspofungin   |                                       |       |      |      | 13    | 6    |     |    |     |    |    |
|                                  |      | micafungin    |                                       |       |      | 6    | 10    | 3    |     |    |     |    |    |
|                                  |      | anidulafungin |                                       |       |      | 1    | 6     | 6    | 5   | 1  |     |    |    |
| <i>Candida haemulonii</i>        | 13   | caspofungin   |                                       |       | 7    | 5    |       | 1    |     |    |     |    |    |
|                                  |      | micafungin    |                                       |       |      | 11   | 2     |      |     |    |     |    |    |
|                                  |      | anidulafungin |                                       |       |      | 2    | 5     | 6    |     |    |     |    |    |
| <i>Clavispora lusitaniae</i>     | 85   | caspofungin   |                                       |       | 36   | 37   | 7     | 2    |     | 1  |     | 2  |    |
|                                  |      | micafungin    |                                       |       | 13   | 63   | 6     |      | 1   | 1  |     | 1  |    |
|                                  |      | anidulafungin |                                       | 3     | 4    | 26   | 39    | 9    | 1   | 2  | 1   |    |    |
| <i>Meyerozyma guilliermondii</i> | 23   | caspofungin   |                                       |       | 2    | 8    | 11    | 2    |     |    |     |    |    |
|                                  |      | micafungin    |                                       |       |      | 2    | 4     | 16   | 1   |    |     |    |    |
|                                  |      | anidulafungin |                                       |       |      |      |       |      | 2   | 11 | 8   | 2  |    |
| <i>Candida inconspicua</i>       | 20   | caspofungin   |                                       |       | 8    | 10   | 2     |      |     |    |     |    |    |
|                                  |      | micafungin    |                                       | 2     | 18   |      |       |      |     |    |     |    |    |
|                                  |      | anidulafungin | 1                                     | 11    | 5    | 3    |       |      |     |    |     |    |    |
| <i>Pichia kudriavzevii</i>       | 137  | caspofungin   |                                       |       |      | 30   | 81    | 21   | 1   | 1  | 1   | 2  |    |
|                                  |      | micafungin    |                                       |       | 2    | 76   | 51    | 4    | 1   | 1  | 2   |    |    |
|                                  |      | anidulafungin |                                       | 4     | 42   | 81   | 7     | 0    | 3   |    |     |    |    |
| <i>Kluyveromyces marxianus</i>   | 63   | caspofungin   | 3                                     | 19    | 35   | 3    | 1     | 1    | 1   |    |     |    |    |
|                                  |      | micafungin    |                                       |       | 18   | 42   | 1     |      | 2   |    |     |    |    |
|                                  |      | anidulafungin | 1                                     | 3     | 9    | 30   | 16    | 3    |     | 1  |     |    |    |

**Table S1 (continued)**

|                                  |    | N° of isolates with an MIC (mg/L) of: |   |   |    |   |   |   |   |    |    |    |    |    |
|----------------------------------|----|---------------------------------------|---|---|----|---|---|---|---|----|----|----|----|----|
| <i>Wickerhamomyces anomalous</i> | 12 | caspofungin                           |   |   | 3  | 9 |   |   |   |    |    |    |    |    |
|                                  |    | micafungin                            |   | 2 | 10 |   |   |   |   |    |    |    |    |    |
|                                  |    | anidulafungin                         | 1 | 3 | 7  | 1 |   |   |   |    |    |    |    |    |
| <i>Saprochaete clavata</i>       | 72 | caspofungin                           |   |   |    |   |   | 2 | 2 | 2  | 66 |    |    |    |
|                                  |    | micafungin                            |   |   |    |   | 1 | 6 | 9 | 10 | 6  | 40 |    |    |
|                                  |    | anidulafungin                         |   |   |    |   |   |   |   | 7  | 12 | 53 |    |    |
| <i>Magnusiomyces capitatus</i>   | 22 | caspofungin                           |   |   |    |   |   |   |   |    | 22 |    |    |    |
|                                  |    | micafungin                            |   |   |    |   |   |   | 1 | 2  | 3  | 16 |    |    |
|                                  |    | anidulafungin                         |   |   |    | 1 |   |   |   | 1  | 12 | 8  |    |    |
| <i>Galactomyces candidus</i>     | 20 | caspofungin                           | 1 | 1 |    | 1 | 1 | 3 | 1 | 2  | 1  | 2  | 7  |    |
|                                  |    | micafungin                            | 1 | 1 | 2  | 1 | 3 |   |   | 3  | 1  | 4  | 1  | 3  |
|                                  |    | anidulafungin                         | 2 |   | 1  |   | 1 | 3 | 1 |    | 1  | 3  | 3  | 8  |
| <i>Yarrowia lipolytica</i>       | 10 | caspofungin                           |   |   |    | 1 | 5 | 1 | 2 |    |    |    | 1  |    |
|                                  |    | micafungin                            |   |   |    |   |   |   | 9 | 1  |    |    |    |    |
|                                  |    | anidulafungin                         |   |   |    |   |   |   | 2 | 5  | 2  |    |    | 1  |
| <i>Rhodotorula mucilaginosa</i>  | 18 | caspofungin                           |   |   |    |   |   |   |   |    |    |    | 18 |    |
|                                  |    | micafungin                            |   |   |    |   |   |   |   |    |    |    | 3  | 15 |
|                                  |    | anidulafungin                         |   |   |    |   |   |   |   |    |    |    | 2  | 16 |
| <i>Trichosporon asahii</i>       | 26 | caspofungin                           |   |   |    |   |   |   |   |    | 2  | 15 | 9  |    |
|                                  |    | micafungin                            |   |   |    |   |   |   |   | 9  | 5  | 1  | 11 |    |
|                                  |    | anidulafungin                         |   |   |    |   |   |   |   |    |    | 2  | 24 |    |

**Table S2:** Caspofungin, Anidulafungin and Micafungin local ECOFF values calculated with ECOFFinder program, for the isolates recovered during the YEASTS program in Paris area

| Species (nb of isolates)              | NRCMA local cut-offs (mg/L) |           |               | EUCAST T-ECOFF (mg/L) |
|---------------------------------------|-----------------------------|-----------|---------------|-----------------------|
|                                       | Caspofungin                 | Micafugun | Anidulafungin | Anidulafungin         |
| <i>Candida albicans</i> (n=968)       | 0.06                        | 0.06      | 0.015         | 0.032                 |
| <i>Candida glabrata</i> (n=334)       | 0.125                       | 0.06      | 0.125         | 0.06                  |
| <i>Candida parapsilosis</i> (n=199)   | 4                           | 1         | 2             | 4                     |
| <i>Candida tropicalis</i> (n=162)     | 0.125                       | 0.06      | 0.125         | 0.06                  |
| <i>Pichia kudriavzevii</i> (n=60)     | 0.5                         | 0.125     | 0.25          | 0.06                  |
| <i>Kluyveromyces marxianus</i> (n=34) | 0.25                        | 0.125     | 0.25          | ND                    |
| <i>Clavispora lusitaniae</i> (n=46)   | 0.06                        | 0.125     | 1             | ND                    |

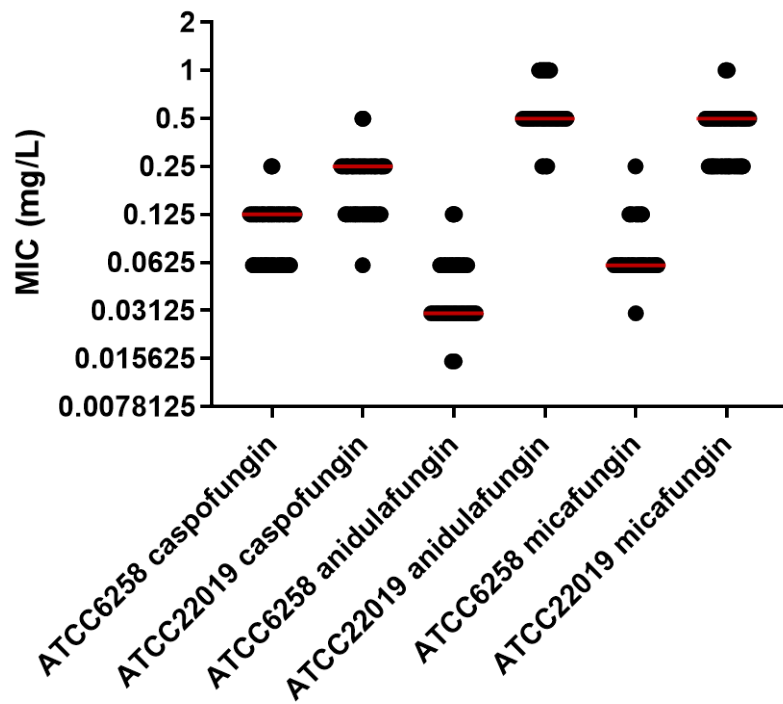

**Supplemental Figure 1. MIC values for caspofungin and anidulafungin for control strains over time.** Median are indicated in red. According to the EUCAST, target values for anidulafungin are 0.03mg/L and 0.5mg/L for ATCC6258 and ATCC22019, respectively. Ranges of acceptable values for anidulafungin are 0.015-0.06mg/L and 0.25-1mg/L for ATCC6258 and ATCC22019, respectively.
